# Supplementary material for: The Importance of Age-Friendly City on Older People’s Continuity and Life Satisfaction
Source: MDPI journal article supplement (doi:10.3390/ijerph18147252), 2021-07-06
Supplement: s1 [file s1]

**Table S1.** Gender differences in external and internal resources, continuity, and life satisfaction.

| Construct           | Gender | Mean  | Min–Max   | SD    | <i>t</i> -Value | <i>p</i> Value |
|---------------------|--------|-------|-----------|-------|-----------------|----------------|
| External Resources  | Male   | 2.169 | 1.00–5.50 | 0.699 | –0.254          | 0.799          |
|                     | Female | 2.179 | 1.00–6.00 | 0.706 |                 |                |
| Internal Resources  | Male   | 3.801 | 1.67–5.67 | 0.723 | 7.200           | 0.000          |
|                     | Female | 3.533 | 1.33–5.67 | 0.716 |                 |                |
| External Continuity | Male   | 2.215 | 0.67–4.00 | 0.647 | –0.009          | 0.993          |
|                     | Female | 2.215 | 0.67–3.67 | 0.643 |                 |                |
| Internal Continuity | Male   | 2.622 | 0.67–3.67 | 0.801 | 1.529           | 0.126          |
|                     | Female | 2.558 | 0.67–3.67 | 0.828 |                 |                |
| Life Satisfaction   | Male   | 3.060 | 1.00–4.00 | 0.445 | 1.310           | 0.191          |
|                     | Female | 3.020 | 1.00–4.00 | 0.475 |                 |                |

Note: *n* of male = 718; *n* of females = 776. Analysis by *t* test.

**Table S2.** Correlation of the variables.

| Variables           | Age       | External Continuity | External Resources | Internal Resources | Internal Continuity | Life Satisfaction |
|---------------------|-----------|---------------------|--------------------|--------------------|---------------------|-------------------|
| Age                 | 1         |                     |                    |                    |                     |                   |
| External Continuity | –0.172    | 1                   |                    |                    |                     |                   |
| External Resources  | –0.012    | 0.167 *             | 1                  |                    |                     |                   |
| Internal Resources  | –0.197    | 0.32                | 0.319 ***          | 1                  |                     |                   |
| Internal Continuity | –0.312    | 0.422 ***           | 0.247 ***          | 0.427 ***          | 1                   |                   |
| Life Satisfaction   | 0.009 *** | 0.183 *             | 0.263 *            | 0.427 ***          | 0.188               | 1                 |

Note: Analysis by Pearson's correlation. Age (ordinal). \*  $p < 0.05$ , \*\*\*  $p < 0.001$ .

**Table S3.** Quartiles of the variables.

| Variable            | Item                                         | 1st Quartile | 2nd Quartile (Median) | 3rd Quartile |
|---------------------|----------------------------------------------|--------------|-----------------------|--------------|
| External Resources  | (i) Satisfaction with Taipei elderly welfare | 2.00         | 3.00                  | 3.00         |
|                     | (ii) Use of elderly welfare services         | 1.00         | 1.00                  | 2.00         |
| Internal Resources  | (ii) Financial satisfaction                  | 3.00         | 4.00                  | 4.00         |
|                     | (iii) Self-rated health                      | 3.00         | 4.00                  | 4.00         |
| External Continuity | (ii) Family & friends                        | 4.00         | 5.00                  | 7.00         |
|                     | (iii) Social activities                      | 0.00         | 0.00                  | 1.00         |
| Internal Continuity | (ii) Internet use                            | 0.00         | 4.00                  | 4.00         |
|                     | (iii) Lifelong learning *                    | 1.00         | 1.00                  | 1.00         |
| Life Satisfaction   |                                              | 3.00         | 3.00                  | 3.00         |

Note: \* Item measured using dichotomous scale (i.e., 1 = Yes; 0 = No)
